# Supplementary material
Source: ML conference proceedings conference paper supplement (https://proceedings.neurips.cc/paper_files/paper/2020/hash/9b72e31dac81715466cd580a448cf823-Abstract.html)
Supplement: Supplementary file [file 9b72e31dac81715466cd580a448cf823-Supplemental.pdf]

---

# Supplementary Materials

---

Xu Liu<sup>1,2\*</sup> Chengtao Li<sup>3</sup> Jian Wang<sup>4</sup> Jingbo Wang<sup>5</sup> Boxin Shi<sup>6†</sup> Xiaodong He<sup>2†</sup>

<sup>1</sup>The University of Tokyo <sup>2</sup>JD AI Research <sup>3</sup>MIT <sup>4</sup>Snap Inc. <sup>5</sup>CUHK <sup>6</sup>Peking University

## A Overview

This supplementary material provides the details of the experiment in the paper. We introduce the details of 3D object detection in Section B and details of ScanNet voxel labeling in Section C.

## B The Experiment on VoteNet

We introduce the implementation details and additional ablation studies of 3D detection in this part.

### B.1 Implementation Details

**Architecture.** We adopt the framework of VoteNet [2], which can be divided into three parts. The backbone, voting and clustering module, and proposal module. Only the backbone is replaced with our method of Group Contextual Encoding PointNet++ (GCE PointNet++) in our experiment.

The configuration of the GCE PointNet++ is shown in Table 1. The numbers are explained as follows. The GCE layer has a receptive field determined by radius  $r$ , MLP network of  $MLP[c_1, \dots, c_k]$  and  $n$  subsampled points. These parameters are inherited from SA layers. Additionally, we use  $K$  to represent the number of code words and  $G$  to represent the number of groups in the GCE Block. In short, the GCE layer can be characterized by  $(n, r, K, G, [c_1, \dots, c_k])$ . It should also be noticed that the number of  $c_k$  is multiplied 3 times in Table 1, which refers to the “ $C \times 3$ ” in our experiment. We can change the expression of “ $\times 3$ ” in the table to “ $\times 2$ ” and “ $\times 1$ ” to get the configuration of  $C \times 2$  and  $C \times 1$  respectively.

Feature Propagation (FP) layers upsample the input point sets to output point set via interpolation and then pass the feature through MLP layers specified by  $[c_1, \dots, c_k]$

Table 1: The configuration of GCE PointNet++ in our experiment of 3D Detection.

| Layer Name | Input Layer | Type | Output Size     | Layer Params                        |
|------------|-------------|------|-----------------|-------------------------------------|
| SA1'       | Raw Input   | GCE  | (2048,3+128×3)  | (2048, 0.2, 8, 12, [64, 64, 128×3]) |
| SA2'       | SA1'        | GCE  | (1024, 3+256×3) | (1024, 0.4, 8, 12, [128,128,256×3]) |
| SA3'       | SA2'        | GCE  | (512, 3+256×3)  | (512, 0.8, 8, 12, [128,128,256×3])  |
| SA4'       | SA3'        | GCE  | (256, 3+256×3)  | (256, 1.2, 8, 12, [128,128,256×3])  |
| FP1        | SA3', SA4'  | FP   | (512, 3+256×3)  | [256,256×3]                         |
| FP2        | SA2', SA3'  | FP   | (1024, 3+256×3) | [256,256×3]                         |

**Training and Inference.** We adopt the same data augmentation methods with VoteNet [2]. Here we also adopted the same optimizer, Adam Optimizer [1], which is utilized with an initial learning rate 0.001. Learning rate is scheduled to be decayed by the factor of 0.1 after 80 epochs and another

---

\*This work is done in JD AI Research

†Corresponding authors: shiboxin@pku.edu.cn, xiaodong.he@jd.com

0.1 after 120 epochs. There are 180 epochs in total, which is the same with VoteNet[2]. The whole model is trained on a single Nvidia Titan-X GPU.

During inference, the points of the entire scene are taken as the input. With a *single shot pass*, the region proposals are generated by the framework and further post-processed by 3D NMS method.

## B.2 Additional Ablation Studies

**Group Number  $G$ .** We investigate the performance w.r.t the group number  $G$  on the dataset of SUN-RGBD v1. The  $G$  should be an divisor of  $C$  and the results are illustrated in Table 2. The items of the first row of  $C \times 1$ , means the channel number is unchanged, has revealed that when  $G$  is small, for instance,  $G = 2$ , the performance is close to encoding layer [6; 5], or  $G = 1$ . When  $G$  is too large, the Channel per group will be reduced, the improvements by group division will be then dropped. And the optimal  $G$  or defined as  $G^*$  will be an number between 1 and  $C$  and in this case is 4.

We also conducted experiments by increasing the output channel  $2\times$  and  $3\times$ , denoted by  $C \times 2$  and  $C \times 3$  in Table 2. It should be noted that 12 is indivisible by  $C \times 2$  and  $C \times 1$ , therefore these items are blank in the table.

The result shows that the optimal choice of  $G$  grows in linear relationship with  $C$ . For example, when channel number is unchanged, the  $G^* = 4$ , and this value is 8, 12 when the channel number is multiplied  $2\times$  and  $3\times$  respectively. In this experiment, we choose “ $C \times 3, G = 12$  as the default setting.

Table 2: Ablation studies of Group Number and Channel factor on Sun RGB-D V1,  $K$  is set to be 8.

| $G$          | 1    | 2    | 4           | 8           | 12          | 16   |
|--------------|------|------|-------------|-------------|-------------|------|
| $C \times 1$ | 54.6 | 54.9 | <b>55.4</b> | 54.6        | –           | 54.9 |
| $C \times 2$ | 55.2 | 55.5 | 55.8        | <b>56.8</b> | –           | 55.4 |
| $C \times 3$ | 55.8 | 55.8 | 55.4        | 56.7        | <b>57.1</b> | 57.0 |

**More results w.r.t.  $K$  and  $G$ .** The performance of the original Encoding layer ( $G = 1$ ) will saturate quickly with the code words. However, the results in the Table 3 show that our method ( $C \times 3, G = 2$  and  $C \times 3, G = 4$ ) can lead to the increase on accuracy without saturation when the number of code words is increased up to 32.

Table 3: Ablation studies of SA2’ layer w.r.t.  $G$  and  $K$  on Sun RGB-D V1.  $C$  is fixed to be  $C \times 3$ .

| $K$                 | 8    | 16   | 24          | 32          |
|---------------------|------|------|-------------|-------------|
| $C \times 3, G = 1$ | 55.8 | 55.5 | <b>56.2</b> | 55.4        |
| $C \times 3, G = 2$ | 55.8 | 56.2 | 56.4        | <b>56.7</b> |
| $C \times 3, G = 4$ | 55.4 | 55.6 | 56.3        | <b>56.6</b> |

**The performance on different seed layers.** Similar to Table 8 of VoteNet [2], we also showed the performance of different seed layers for the benchmark of SUN-RGBD and ScanNet in Table 4 and in Table 5 respectively. We can infer from these results that the GCE block can improve the performance significantly on these benchmarks.

On the benchmark of SUN-RGBD, we found that the performance of FP2 layer is less satisfying than FP1 layer. Similar result is also shown in the original VoteNet [2] that the performance of FP2 layer is better than FP3 layer, implying FP operation is not an optimal choice for decoding layer. The methods to design a suitable decoding layer for point convolution could be a future research topic.

Table 4: Ablation studies of PointNet++ and our module with different seed layers, evaluated on SUN-RGBD

| Seed Layer  | SA2/SA2’   | SA3/SA3’ | SA4/SA4’ | FP1         | FP2         |
|-------------|------------|----------|----------|-------------|-------------|
| PointNet++  | 51.2       | 56.3     | 55.1     | 56.6        | <b>57.7</b> |
| <b>Ours</b> | 57.1       | 58.0     | 59.3     | <b>60.7</b> | 59.1        |
| $\Delta$    | <b>5.9</b> | 1.7      | 4.2      | 4.1         | 1.4         |

Table 5: Ablation studies of PointNet++ and our module with different seed layers, evaluated on ScanNet.

| Seed Layer  | SA2/SA2' | SA3/SA3' | SA4/SA4'   | FP1  | FP2         |
|-------------|----------|----------|------------|------|-------------|
| PointNet++  | 51.2     | 54.3     | 47.4       | 56.6 | <b>58.6</b> |
| <b>Ours</b> | 56.3     | 58.3     | 53.9       | 59.0 | <b>60.8</b> |
| $\Delta$    | 5.1      | 4.0      | <b>6.5</b> | 2.4  | 2.2         |

## C Experimental Details on ScanNet Voxel Labeling

In the experiment, we followed the previous data processing methods [3; 4], the points are uniformly sampled and divided into the block with the size of  $1.5m \times 1.5m$ . There are 8192 points sampled on-the-fly during the training process. The architecture is built upon the Pointnet++ [4], we replace the SA modules with GCE blocks and choose  $K = 8$ ,  $G = 12$ ,  $C \times 3$  as the default setting.

## References

- [1] Kingma, D.P., Ba, J.: Adam: A method for stochastic optimization. arXiv preprint arXiv:1412.6980 (2014)
- [2] Qi, C.R., Litany, O., He, K., Guibas, L.J.: Deep hough voting for 3d object detection in point clouds. arXiv preprint arXiv:1904.09664 (2019)
- [3] Qi, C.R., Su, H., Mo, K., Guibas, L.J.: Pointnet: Deep learning on point sets for 3d classification and segmentation. In: Proceedings of the IEEE Conference on Computer Vision and Pattern Recognition. pp. 652–660 (2017)
- [4] Qi, C.R., Yi, L., Su, H., Guibas, L.J.: Pointnet++: Deep hierarchical feature learning on point sets in a metric space. In: Advances in neural information processing systems. pp. 5099–5108 (2017)
- [5] Zhang, H., Dana, K., Shi, J., Zhang, Z., Wang, X., Tyagi, A., Agrawal, A.: Context encoding for semantic segmentation. In: Proceedings of the IEEE Conference on Computer Vision and Pattern Recognition. pp. 7151–7160 (2018)
- [6] Zhang, H., Xue, J., Dana, K.: Deep ten: Texture encoding network. In: Proceedings of the IEEE Conference on Computer Vision and Pattern Recognition. pp. 708–717 (2017)
